# Supplementary material for: Asymmetric, biraphid diatoms from the Laurentian Great Lakes
Source: PeerJ. 2023 Feb 14;11:e14887. doi: 10.7717/peerj.14887 (PMC9936871; doi:10.7717/peerj.14887)
Supplement: Supplemental Information 1 [file peerj-11-14887-s001.xlsx]

## Sheet: Sheet1
Raw data used to generate results in Tables 1 and 2
Figure	Letter	Taxon	locale	length (µm)	width (µm)	striae/10 µm	punctae/10 µm
15	A	Encyonema auerswaldii Rabenh.	606	31.5	10.5	11	23
15	B	Encyonema auerswaldii Rabenh.	588	30	10	11	20
15	C	Encyonema auerswaldii Rabenh.	470	28.5	9.5	10	23
15	D	Encyonema auerswaldii Rabenh.	352	28	9	12	22
15	E	Encyonema auerswaldii Rabenh.	311	23	9	12	25
15	F	Encyonema auerswaldii Rabenh.	761	20.5	9	14	24
15	G	Encyonema auerswaldii Rabenh.	735	19	10	14	22
15	H	Encyonema auerswaldii Rabenh.	350	n/a	10	12	22
15	I	Encyonema auerswaldii Rabenh.	311	26.5	9.5	14	n/a
15	J	Encyonema auerswaldii Rabenh.	462	29.5	10	10	24
15	K	Encyonema auerswaldii Rabenh.	374	29.5	11	13	24
15	L	Encyonema auerswaldii Rabenh.	470	30.5	10.5	12	23
15	M	Encyonema auerswaldii Rabenh.	273	22.5	8.5	14	n/a
14	A	Encyonema silesiacum (Bleisch in Rabenh.) D.G.Mann	420	14.5	6	14	32
14	B	Encyonema silesiacum (Bleisch in Rabenh.) D.G.Mann	407	15	6	14	33
14	C	Encyonema silesiacum (Bleisch in Rabenh.) D.G.Mann	311	15.5	6	16	n/a
14	D	Encyonema silesiacum (Bleisch in Rabenh.) D.G.Mann	375	17	5.5	16	n/a
14	E	Encyonema silesiacum (Bleisch in Rabenh.) D.G.Mann	389	17.5	6	17	n/a
14	F	Encyonema silesiacum (Bleisch in Rabenh.) D.G.Mann	352	18.5	n/a	15	30
14	G	Encyonema silesiacum (Bleisch in Rabenh.) D.G.Mann	102	19	6.5	15	30
14	H	Encyonema silesiacum (Bleisch in Rabenh.) D.G.Mann	247	19	6.5	12	31
14	I	Encyonema silesiacum (Bleisch in Rabenh.) D.G.Mann	375	21.5	8.5	16	31
14	J	Encyonema silesiacum (Bleisch in Rabenh.) D.G.Mann	208	33	8	11	33
14	K	Encyonema silesiacum (Bleisch in Rabenh.) D.G.Mann	461	24.5	7	11	32
14	L	Encyonema silesiacum (Bleisch in Rabenh.) D.G.Mann	407	23.5	7	12	30
14	M	Encyonema silesiacum (Bleisch in Rabenh.) D.G.Mann	461	23	6	14	30
14	T	Encyonema lange-bertalotii Krammer	470	19	6.5	13	n/a
14	U	Encyonema lange-bertalotii Krammer	247	18.5	5.5	16	n/a
14	V	Encyonema lange-bertalotii Krammer	247	18	6	13	n/a
14	W	Encyonema ventricosum (C.Agardh) Grunow	299	15.5	5.5	18	n/a
14	X	Encyonema ventricosum (C.Agardh) Grunow	311	15.5	5.5	16	n/a
